# Supplementary material for: Selection at a Single Locus Leads to Widespread Expansion of Toxoplasma gondii Lineages That Are Virulent in Mice
Source: PubMed Central journal article supplement (PMC2644818; doi:10.1371/journal.pgen.1000404), 2009-03-06

# A Chromosome VIIa

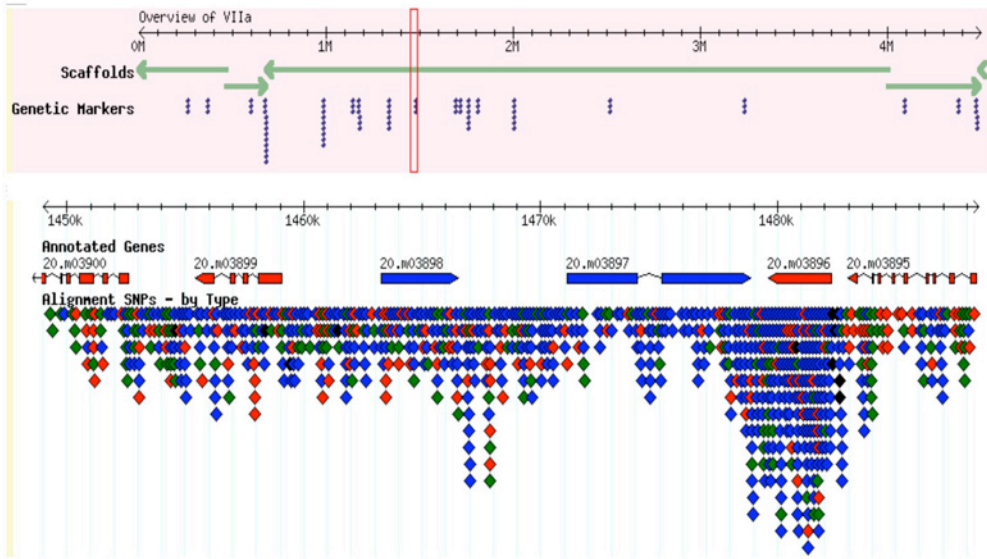

# B

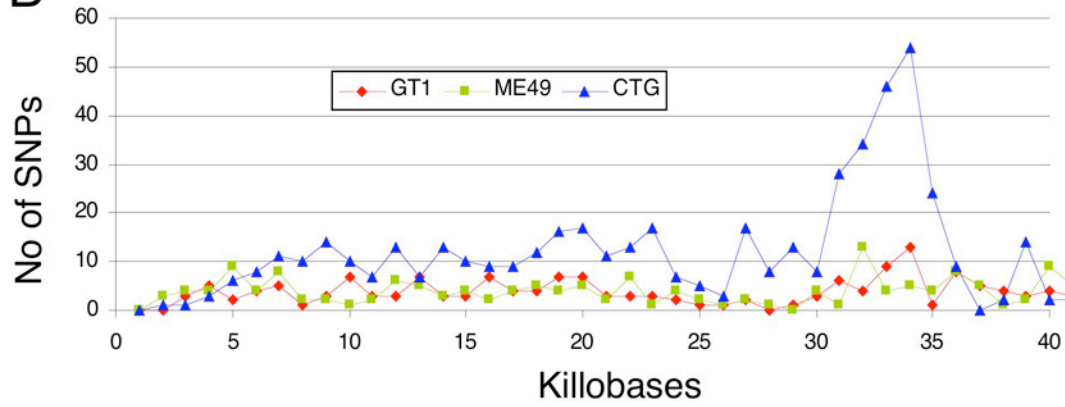

Supplement: pgen.1000404.s001.pdf [file pgen.1000404.s001.pdf]
