# Supplementary material for: Selection at a Single Locus Leads to Widespread Expansion of Toxoplasma gondii Lineages That Are Virulent in Mice
Source: PubMed Central journal article supplement (PMC2644818; doi:10.1371/journal.pgen.1000404), 2009-03-06
Supplement: pgen.1000404.s002.pdf [file pgen.1000404.s002.pdf]

**Table S1: List of loci used for diversity comparison of *T. gondii* strains**

| List of Loci                  | Annotation Gene Model <sup>a</sup> | Category         | Chromosome |
|-------------------------------|------------------------------------|------------------|------------|
| SAG1                          | 44.m00009                          | Surface Antigens | VIII       |
| SAG2                          | 59.m00008                          | Surface Antigens | VIII       |
| SAG3                          | 551.m00001                         | Surface Antigens | XII        |
| SAG4                          | 72.m00004                          | Surface Antigens | VIIa       |
| BSR4                          | 641.m01561                         | Surface Antigens | IV         |
| GRA2                          | 42.m00015                          | Dense Granule    | X          |
| GRA3                          | 42.m00013                          | Dense Granule    | X          |
| GRA4                          | 583.m11414                         | Dense Granule    | XI         |
| GRA6                          | 63.m00002                          | Dense Granule    | X          |
| GRA7                          | 20.m00005                          | Dense Granule    | VIIa       |
| ROP1                          | 583.m00003                         | Rhoptries        | XI         |
| ROP2                          | 33.m01398                          | Rhoptries        | X          |
| ROP5                          | 551.m00238                         | Rhoptries        | XII        |
| ROP7                          | 83.m02145                          | Rhoptries        | Ia         |
| ROP8                          | 33.m00005                          | Rhoptries        | X          |
| ROP16                         | 55.m08219                          | Rhoptries        | VIIb       |
| ROP17                         | 55.m08191                          | Rhoptries        | VIIb       |
| ROP18                         | 20.m03896                          | Rhoptries        | VIIa       |
| BSR4 Related                  | 86.m00375                          | Housekeeping     | Ia         |
| MIC2                          | 20.m00002                          | Housekeeping     | VIIa       |
| AMA1                          | 55.m00005                          | Housekeeping     | VIIb       |
| Actin (Actin)                 | 25.m00007                          | Housekeeping     | Ib         |
| BTUB ( $\beta$ -tubulin)      | 57.m00003                          | Housekeeping     | IX         |
| ATUB                          | 583.m00022                         | Housekeeping     | XI         |
| HSP90                         | 49.m00060                          | Housekeeping     | VI         |
| BAG1/5                        | 55.m00009                          | Housekeeping     | VIIb       |
| DHFR-TS                       | 50.m00016                          | Housekeeping     | XII        |
| Hypothetical protein          | 42.m03409                          | Housekeeping     | X          |
| Hypothetical protein          | 42.m03493                          | Housekeeping     | X          |
| UPRT                          | 583.m00018                         | Intron           | XI         |
| Elongation Factor intron 1    | 42.m00069                          | Intron           | X          |
| Hypothetical protein intron 2 | 27.m00099                          | Intron           | IV         |

<sup>a</sup> Sequences from ToxoDB.org Gajria B, Bahl A, Brestelli J, Dommer J, Fischer S, et al. (2007) ToxoDB: an integrated *Toxoplasma gondii* database resource. Nucl Acids Res 36: D553-556.
