# Supplementary material for: Selection at a Single Locus Leads to Widespread Expansion of Toxoplasma gondii Lineages That Are Virulent in Mice
Source: PubMed Central journal article supplement (PMC2644818; doi:10.1371/journal.pgen.1000404), 2009-03-06
Supplement: pgen.1000404.s003.pdf [file pgen.1000404.s003.pdf]

**Table S2. Strains used in this study**

| <b>Strain name</b> | <b>Host</b>              | <b>Year</b> | <b>Geographic</b> | <b>Virulence<sup>b</sup></b> | <b>Haplogroup<sup>c</sup></b> |
|--------------------|--------------------------|-------------|-------------------|------------------------------|-------------------------------|
| RH                 | Human                    | 1939        | USA               | 100                          | 1                             |
| GT1                | goat                     | 1980        | USA-MD            | 100                          | 1                             |
| ENT                | Human (CT <sup>a</sup> ) | 1985        | France            | 100                          | 1                             |
| VEL                | Human (AIDS)             | 1988        | USA               | 100                          | 1                             |
| OH3                | Human ocular             | unknown     | Brazil            | 100                          | 1                             |
| MOR                | Human (CT)               | 1988        | France            | 100                          | 1                             |
| Me49               | Sheep                    | 1965        | USA-CA            | 40                           | 2                             |
| DEG                | Human (CT)               | 1987        | France            | 0                            | 2                             |
| PIH                | Human (AIDS)             | 1992        | USA               | 0                            | 2                             |
| ARI                | Human<br>(Transplant)    | 1992        | USA               | 80                           | 2                             |
| PE                 | Human<br>(Transplant)    | 1992        | USA               | 31                           | 2                             |
| B41                | Bear                     | 1994        | USA               | ND                           | 2                             |
| CTG                | Cat                      | 1976        | USA-NH            | 0                            | 3                             |
| VEG                | Human (AIDS)             | 1988        | USA-CA            | 13                           | 3                             |
| STRL               | Human (CT)               | unknown     | USA               | 0                            | 3                             |
| T61                | Turkey                   | unknown     | USA               | ND                           | 3                             |
| C56                | Chicken                  | unknown     | USA               | 0                            | 3                             |
| M7741              | Sheep                    | 1958        | USA               | 11                           | 3                             |
| EDZ                | Human (CT)               | unknown     | USA               | ND                           | 3                             |
| MAS                | Human (CT)               | 1991        | France (Nice)     | 100                          | 4                             |
| TgCatBr1           | Cat                      | 2006        | Brazil            | 90                           | 4                             |
| TgCatBr18          | Cat                      | 2006        | Brazil            | 100                          | 4                             |
| CASTELLS           | Sheep                    | 1993        | Uruguay           | 100                          | 4                             |
| GUYKOE             | Human                    | 2002        | French Guyana     | 100                          | 5                             |
| GUYMAT             | Human                    | 2002        | French Guyana     | 100                          | 5                             |
| RUB                | Human                    | 1992        | French Guyana     | 100                          | 5                             |
| BOF                | Human (AIDS)             | 1993        | Belgium           | 8.3                          | 6a                            |
| FOU                | Human                    | 1992        | France (Brest)    | 100                          | 6a                            |
| TgCatBr2           | Cat                      | 2006        | Brazil            | 100                          | 6b                            |
| TgCatBr9           | Cat                      | 2006        | Brazil            | 100                          | 6b                            |
| CAST               | Human (AIDS)             | 1988        | USA-CA            | 100                          | 7                             |
| TgCatBr6           | Cat                      | 2006        | Brazil            | 100                          | 8                             |
| P89                | Pig                      | 1991        | USA-IA            | 76                           | 9                             |
| TgCatBr3           | Cat                      | 2006        | Brazil            | 0                            | 9                             |
| TgCatBr10          | Cat                      | 2006        | Brazil            | 100                          | 9                             |
| GUYDOS             | Human                    | 2001        | French Guyana     | 100                          | 10                            |

|      |        |      |               |     |    |
|------|--------|------|---------------|-----|----|
| VAND | Human  | 1997 | French Guyana | 100 | 10 |
| COUG | Cougar | 1996 | Canada-BC     | 90  | 11 |

<sup>a</sup> Congenital

<sup>b</sup> % Cumulative mortality in outbred CD1 mice as defined previously (Taylor S, Barragan A, Su C, Fux B, Fentress SJ, et al. (2006) A secreted serine-threonine kinase determines virulence in the eukaryotic pathogen *Toxoplasma gondii*. Science 314: 1776-1780.)

<sup>c</sup> Khan A, Bohme U, Kelly KA, Adlem E, Brooks K, et al. (2006) Common inheritance of chromosome Ia associated with clonal expansion of *Toxoplasma gondii*. Gen Res 16: 1119-1125.

Khan A, Fux B, Su C, Dubey JP, Darde ML, et al. (2007) Recent transcontinental sweep of *Toxoplasma gondii* driven by a single monomorphic chromosome. Proc Natl Acad Sci (USA) 104: 14872-14877.

ND, not determined
