# Supplementary material for: Selection at a Single Locus Leads to Widespread Expansion of Toxoplasma gondii Lineages That Are Virulent in Mice
Source: PubMed Central journal article supplement (PMC2644818; doi:10.1371/journal.pgen.1000404), 2009-03-06
Supplement: pgen.1000404.s004.pdf [file pgen.1000404.s004.pdf]

**Table S3 Comparison of pNS and pS ratios for *ROP18* alleles**

| Strains                            | <i>ROP18</i> |         |          |
|------------------------------------|--------------|---------|----------|
|                                    | pNS          | pS      | pNS/pS   |
| <sup>a</sup> Type I vs. Type II    | 0.02497      | 0.00536 | 4.660258 |
| Type I vs. Type III                | 0.06049      | 0.03473 | 1.742024 |
| Type II vs. Type III               | 0.05415      | 0.04036 | 1.341758 |
| <sup>b</sup> Type I* vs. Type II*  | 0.02323      | 0.00675 | 3.535183 |
| Type I* vs. Type III*              | 0.06741      | 0.04565 | 1.476658 |
| Type II* vs. Type III*             | 0.05665      | 0.04895 | 1.159953 |
| <sup>c</sup> Type I*a vs. Type I*b | 0.00238      | 0.00252 | 0.944776 |
| Type I*a vs. Type I*c              | 0.00383      | 0.00251 | 1.527424 |
| Type I*a vs. Type I*c              | 0.00621      | 0.00503 | 1.236186 |

pN, Estimate of the proportion of nonsynonymous differences;  $pNS = NSd/NS$ ,

NS, The number of nonsynonymous sites for each codon

NSd, The number of synonymous differences per codon

pS, Estimate of the proportion of synonymous differences;  $pS = Sd/S$ ,

S, The number of synonymous sites for each codon

Sd, The number of synonymous differences per codon

<sup>a</sup> Includes only North American and European clonal lineages, based on 2 strains each.

<sup>b</sup> ROP18I\* (17) II\* (3) and III\* (5) groups were defined based on the phylogeny shown in Fig 2C and the numbers of strains are given in parentheses.

<sup>c</sup> ROP18Ia\* (5), ROP18I\*b (5) and ROP18I\*c (6) are defined in Figure 4A and the numbers of strains are given in parentheses.
