# Supplementary material for: Selection at a Single Locus Leads to Widespread Expansion of Toxoplasma gondii Lineages That Are Virulent in Mice
Source: PubMed Central journal article supplement (PMC2644818; doi:10.1371/journal.pgen.1000404), 2009-03-06
Supplement: pgen.1000404.s006.pdf [file pgen.1000404.s006.pdf]

**Table S5 Estimating the age of *ROP18* based on synonymous substitutions**

| Groups                             | Total SNPs | Sequenced Region          |                            |          | Synonymous Polymorphisms | Age in years since TMRCA |                    | No of Strains | Haplo-groups                     |
|------------------------------------|------------|---------------------------|----------------------------|----------|--------------------------|--------------------------|--------------------|---------------|----------------------------------|
|                                    |            | Two fold degenerate sites | Four fold degenerate sites | Total bp |                          | M1                       | M2                 |               |                                  |
| <sup>a</sup> Type I*               | Total obs  | 4799                      | 5986                       | 35091    | 11                       | $6.90 \times 10^5$       | $3.45 \times 10^5$ | 21            | 1, 4, 5, 6, 7, 8, 9, 10          |
| Type II*                           | Total obs  | 1371                      | 1713                       | 10026    | 0                        | NA                       | NA                 | 6             | 2, 11                            |
|                                    | Total adj  | 1371                      | 1713                       | 10026    | 2.99 <sup>¶</sup>        | $6.56 \times 10^5$       | $3.28 \times 10^5$ |               |                                  |
| Type III*                          | Total obs  | 2270                      | 2899                       | 15039    | 2                        | $2.61 \times 10^5$       | $1.30 \times 10^5$ | 9             | 3, 9, 4                          |
|                                    | Total adj  | 2270                      | 2899                       | 15039    | 6.29 <sup>¶¶</sup>       | $8.22 \times 10^5$       | $4.10 \times 10^5$ |               |                                  |
| Type I* vs Type II* <sup>b</sup>   | Total obs  | 6170                      | 7699                       | 45117    | 23                       | $1.12 \times 10^6$       | $5.61 \times 10^5$ | 27            | 1, 4, 5, 6, 7, 8, 9, 10, 2, 11   |
| Type I* vs Type III* <sup>b</sup>  | Total obs  | 7069                      | 8885                       | 50130    | 283                      | $1.2 \times 10^7$        | $6 \times 10^6$    | 30            | 1, 4, 5, 6, 7, 8, 9, 10, 3, 9, 4 |
| Type II* vs Type III* <sup>b</sup> | Total obs  | 3641                      | 4612                       | 26736    | 290                      | $2.37 \times 10^7$       | $1.19 \times 10^7$ | 16            | 2, 11, 3, 9, 4                   |

<sup>a</sup> As defined in Fig. 2C, NA, Not applicable, M1 (Hughes AL, Verra F (2001) A very large long-term effective population size in the virulent human malaria parasite *Plasmodium falciparum*. Proc Roy Soc Lond 268: 1855-1860.), and M2 (Rich SM, Licht MC, Hudson RR, Ayala FJ (1998) Malaria's Eve: evidence for a recent population bottleneck throughout the world populations of *Plasmodium falciparum*. Proc Natl Acad Sci (USA) 95: 4425-4430.), are different age estimates for the neutral mutation rate.

<sup>¶</sup> Total adjusted (Total adj) was calculated by using Poisson upper 95% confidence limit for zero observation: 2.99 “total observed” (Total obs) mutations, limit for 2 observations: 6.29 “total observed” (total obs) substitutions.

MRCAs Calculation: Total synonymous number of SNPs / (Two fold codon sites x Number of strains x Two fold mutation rate) + (Four fold codon sites x Number of strains x Four fold mutation rate)

<sup>b</sup> Rules used for classifying SNPs: Type III = Neospora = Ancestral state, Type I/II = Neospora = Ancestral state, Type III not equal to Neospora, the majority is the Ancestral state.
